# Supplementary material for: Experiments and DFT investigation of microwave-assisted sol–gel method prepared S-doped g-C3N4 for enhanced photocatalytic degradation of gaseous toluene
Source: Royal Society of Chemistry journal article supplement (doi:10.1039/d2nj06154f), 2023-01-01
Supplement: d2nj06154f1.pdf [file d2nj06154f1.pdf]

## Supplementary Information

### **Experiments and DFT investigation of microwave-assisted sol-gel method prepared S-doped g-C<sub>3</sub>N<sub>4</sub> for enhanced photocatalytic degradation of gaseous toluene**

Anming Li<sup>1</sup>, Xinhang Cong<sup>1</sup>, Haotong Qin<sup>1</sup>, Weichao Xu<sup>1</sup>, Xuehan Zhang<sup>1</sup>, Wenzhuang Wang<sup>1</sup>, Feng Guo\*<sup>1</sup>

<sup>1</sup>School of Ocean Science and Technology, Dalian University of Technology, Panjin 124221, China

**Table of Contents:**

**Fig. S1. The schematic of the experimental system for toluene photo-degradation.**

**Table S1. The C/N molar ratio of g-C<sub>3</sub>N<sub>4</sub> and CN-S(1)**

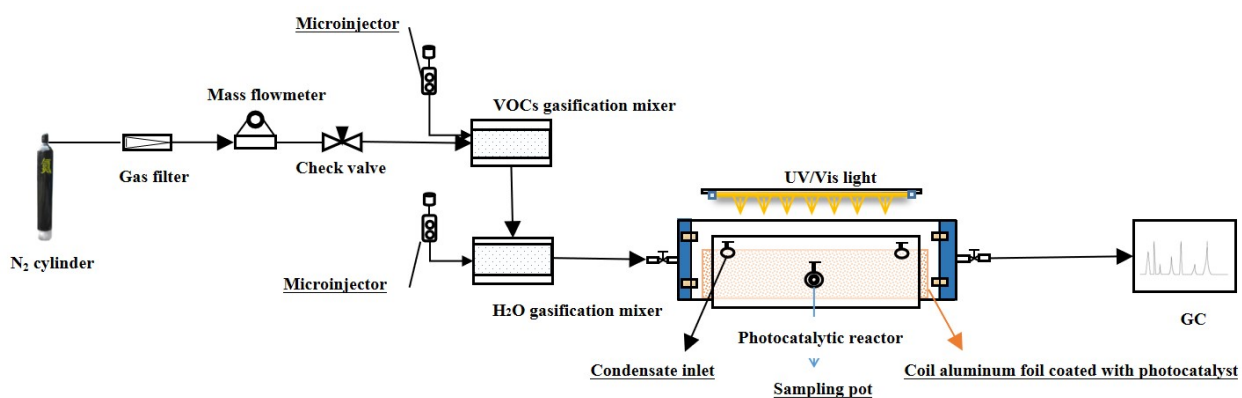

Figure S1. The schematic of the experimental system for toluene photo-degradation.

Table S1. The C/N molar ratio of g-C<sub>3</sub>N<sub>4</sub> and CN-S(1)

|                                 | SP <sup>2</sup> heterocarbon | SP <sup>3</sup> heterocarbon | SP <sup>2</sup> hybrid carbon<br>/SP <sup>3</sup> hybrid carbon | C %  | N %   | C/N molar<br>ratio |
|---------------------------------|------------------------------|------------------------------|-----------------------------------------------------------------|------|-------|--------------------|
| g-C <sub>3</sub> N <sub>4</sub> | 65285.2                      | 42670.9                      | 2.24                                                            | 42.5 | 55.78 | 0.78               |
| CN-S(1)                         | 86016.0                      | 38406.2                      | 1.5                                                             | 42.8 | 54.37 | 0.81               |
